# Supplementary material for: Data mining: Traditional Spring Festival Associated With Hypercholesterolemia
Source: Research Square preprint supplement (doi:10.21203/rs.3.rs-360460/v1), 2021-04-12
Supplement: Supplementary file 1 [file 13116982e56a253d4737f9ce.docx]

**Supplemental Material**

**Supplemental Figure 1** Seasonal variation in lipid levels by sex

A to D present the seasonal variation in lipid levels in males; E to H present the seasonal variation in lipid profiles in females.

**Supplemental Figure 2** Prevalence of dyslipidaemia by sex

The figures present the prevalence of dyslipidaemia in the first week after the Spring Festival.
